# Supplementary material for: A dispensable paralog of succinate dehydrogenase subunit C mediates standing resistance towards a subclass of SDHI fungicides in Zymoseptoria tritici
Source: PubMed Central journal article supplement (PMC6941823; doi:10.1371/journal.ppat.1007780), 2019-12-20

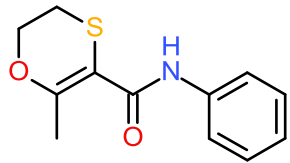

Carboxin

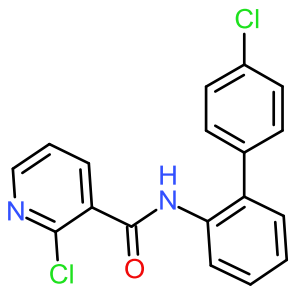

Boscalid

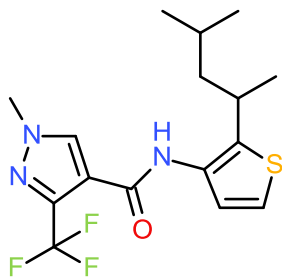

Penthiopyrad

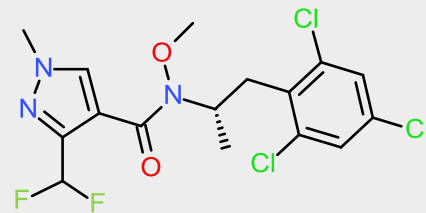

Pydiflumetofen

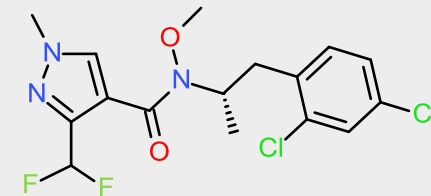

Compound 3

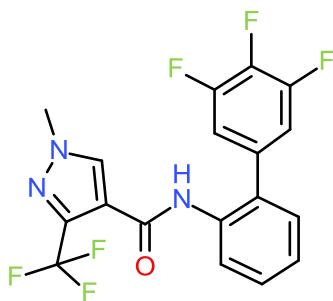

Fluxapyroxad

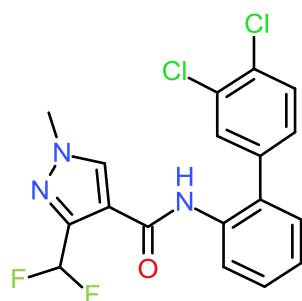

Bixafen

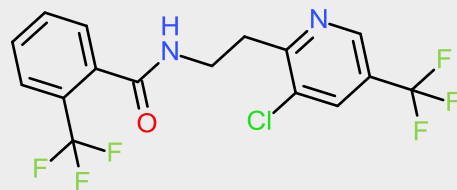

Fluopyram

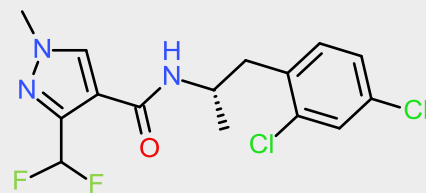

Compound 2

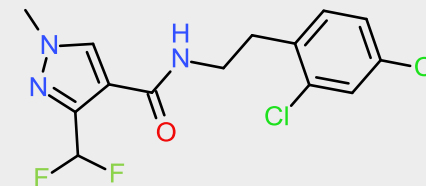

Compound 1

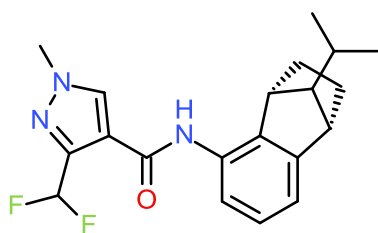

Isopyrazam

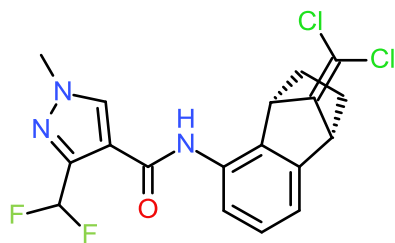

Benzovindiflupyr

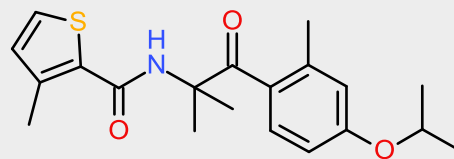

Isofetamid

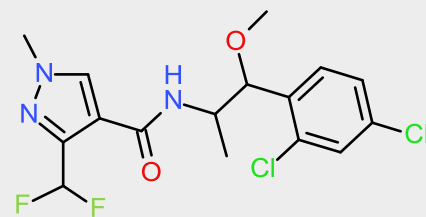

Compound 4

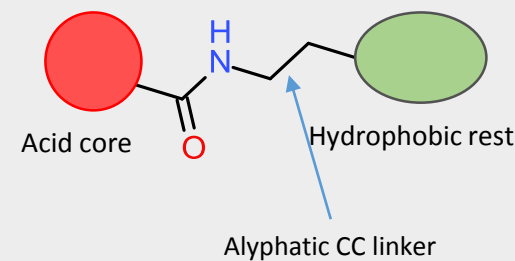

Supplement: ppat.1007780.s001.pdf [file ppat.1007780.s001.pdf]
