# Supplementary material for: A dispensable paralog of succinate dehydrogenase subunit C mediates standing resistance towards a subclass of SDHI fungicides in Zymoseptoria tritici
Source: PubMed Central journal article supplement (PMC6941823; doi:10.1371/journal.ppat.1007780), 2019-12-20

*ZtSDHC2 (partial)*

*ZtSDHA*

*ZtSDHD*

*ZtSDHB*

*ZtSDHC1*

**Mycgr3G48520**

**Mycgr3G53658**

**Mycgr3G57478**

**Mycgr3G74146**

**Mycgr3G74581**

Data table:  
NGS\_Data\_Blanked

Marking:  
■ Marking

Color by  
Category

- Mycgr3G48520
- Mycgr3G53658
- Mycgr3G57478
- Mycgr3G74146
- Mycgr3G74581

Reference points:  
— Median

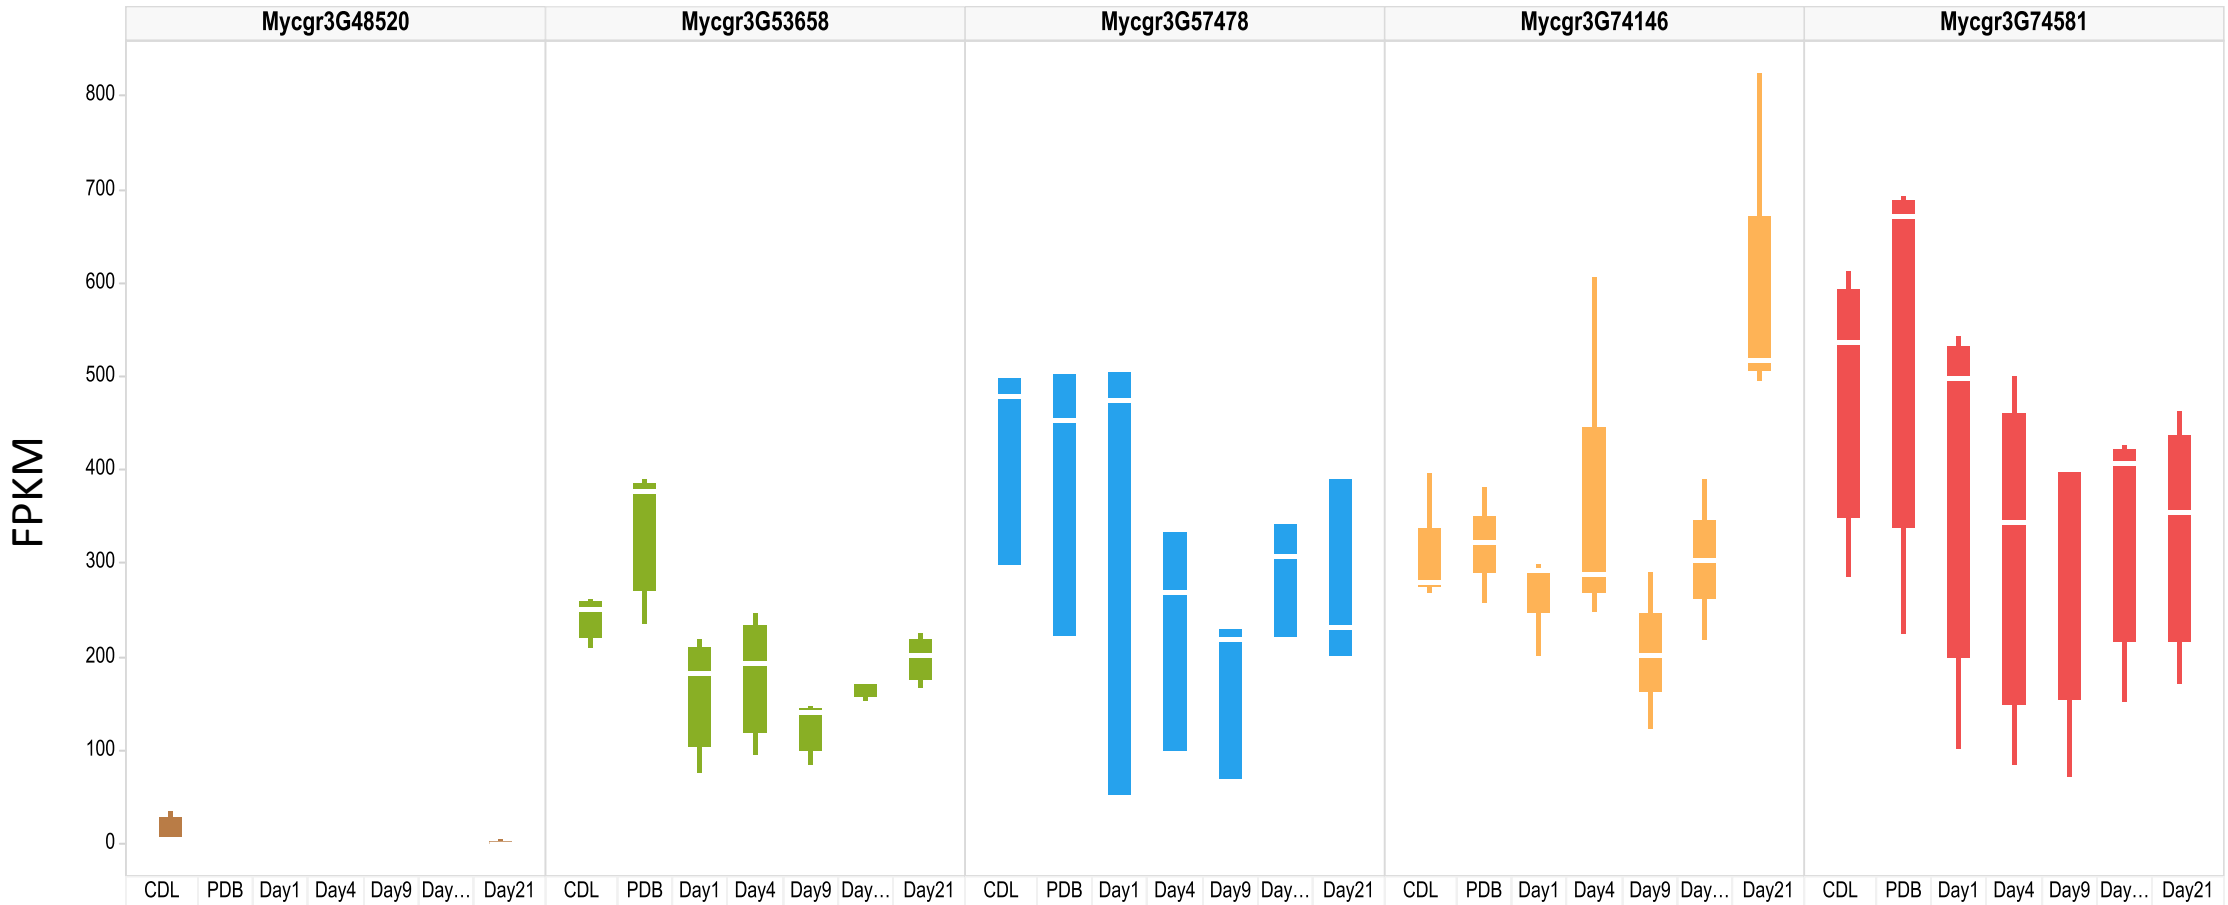

Supplement: ppat.1007780.s003.pdf [file ppat.1007780.s003.pdf]
