# Supplementary material for: A dispensable paralog of succinate dehydrogenase subunit C mediates standing resistance towards a subclass of SDHI fungicides in Zymoseptoria tritici
Source: PLoS Pathog. 2019 Dec 20;15(12):e1007780. doi: 10.1371/journal.ppat.1007780 (PMC6941823; doi:10.1371/journal.ppat.1007780)
Supplement: S4 Dataset — (XLSX) [file ppat.1007780.s018.xlsx]

## Sheet: Oligos Mapping
CAPS markers:
Oligo name (Fwd)	5'-3' Sequence (Fwd)	Oligo name (Rev)	5'-3' Sequence (Rev)	Restriction enzyme	SNP Position (IPO323)
CAPS_C3_3426900_f	agcagacaaggaatacaagggtc	CAPS_C3_3426900_r	caccgaccctcaacttcatcc	EcoR1	3426900
CAPS_C3_3357589BF	tccggttgagcacttgagga	CAPS_C3_3357589BR	gacaatcggcattcttgggg	BamH1	3357589
CAPS_C3_3291089BF	acgtgaggtcgtcgagtgga	CAPS_C3_3291089BR	cgatgggcggtggattgaac	BamH1	3291089
CAPS_C3_3241882EF	cttgagcggtttcaacaaatccat	CAPS_C3_3241882ER	ttttggctcggtcattggct	EcoRI	3241882
CAPS_C3_3239433SF	tgtcggagagattcccaagattc	CAPS_C3_3239433SR	tctttccgatcccatcaaatga	SacI	3239433
CAPS_C3_3233082BF	cttatcagcggcagcttggt	CAPS_C3_3233082BR	aacttcttcttggcagcgcc	BamH1	3233082
C3_3217341Ps_f	tatgctttggtcttggcagctct	C3_3217341Ps_r	atggcctactggctggcagaaag	PstI	3217341
C3_3213656E_1f	gatccgcaagagtttgtcccaca	C3_3213656E_1r	tcgactggcttctccctctcaag	EcoRI	3213656
CAPS_C3_3205364SF	ccgatgaggcagaagaggtggtag	CAPS_C3_3205364SR	tccttcgactttgaaacgctcg	SacI	3205364
CAPS_C3_3203138AF	ccccaacatcctgattctcgcg	CAPS_C3_3203138AR	tctcggtgccacgtttccagc	ApaI	3203138
C3_3201627ps_f	tctgcaagagaacctcttcctcaa	C3_3201627ps_r	cttctcatcgggctttgacctc	PstI	3201627
C3_3200730sal_f	gatgtcgttaacgcggattctg	C3_3200730sal_r	cgttgaggaagaggttctcttgca	SalI	3200730
CAPS_C3_3191254RF	acccgaacggatcggaagatcattc	CAPS_C3_3191254RR	ttccgtcgccagacttctcgct	EcoRV	3191254
CAPS_C3_3190973SF	aaaggccggtccggaatctcac	CAPS_C3_3190973SR	ggcgatggaagtgttgtaggctt	SacI	3190973
CAPS_C3_3187231EF	gacactcacgaacgaccacc	CAPS_C3_3187231ER	gctgaggtgtcaaagatgtcgt	EcoRI	3187231
CAPS_C3_3163840HF	gacttgttgaagatggcttgga	CAPS_C3_3163840HR	agtggcagagtttcttgattgg	HindIII	3163840
CAPS_C3_3131215EF	cacttctcagtggcaggttcg	CAPS_C3_3131215ER	atgtggctcgacccaaactg	EcoRI	3131215
CAPS_C3_3103412EF	atcctcaggaccacctgtatatgt	CAPS_C3_3103412ER	aatatggccgctccagtcga	EcoRI	3103412
CAPS_C3_3088578BF	tatcaccttattgacgaatacaggc	CAPS_C3_3088578BR	atttcgaggcatgctctatacc	BamH1	3088578
SSR marker:
Oligo name (Fwd)	5'-3' Sequence (Fwd)	Oligo name (Rev)	5'-3' Sequence (Rev)	Type	Locus (IPO323)
ag-003 F	acttggggaggtgttgtgag	ag-003 R	acgaattgttcattccagcg	SSR ag repeats (15)	3236053-3236304
Structural marker:
Oligo name (Fwd)	5'-3' Sequence (Fwd)	Oligo name (Rev)	5'-3' Sequence (Rev)	Type	Locus (IPO323)
3200730_11 fwd	CGGAAATGTTGACTGCGATGACAGAACACA	SNP 3213361 rev	GCGAAGGAATGAACTGAACAAAG	Large insertion (1)	3208771-3213391
3213361_1 fwd	TCGCCATTGTTTCCGCATGCGCCTTGCCTCCCTA	3213361_1 rev	CAATCATACAAAGGCGACGTTCACTTATTC		3213455-3214255
3213361_2 fwd	GGACGGCTTTGACGGGGAGGGGTTTCGCCG	3213361_2 rev	ATCGTGTTCCCTACAATCTACAGCCTTTTA		3213911-3214710
3213361_3 fwd	CACAACCCATGCAAGTATTCCAGTAAGATA	3213361_3 rev	AGAGTGTATGGATGGAAGTGAGGTTCATTG		3214256-3215088
3213361_4 fwd	GTAGATTGTAGGGAACACGATTCCAAGGACCAG	3213361_4 rev	GGTGAAGCGTCCGAGGCCATTGAAAGCAGC		3214690-3215544
3213361_5 fwd	TCCGATTCAATTGTTCGAATAGTGTCTTCC	3213361_5 rev	ACCTCATTCAGAATTGGACGCCGACTCTTC		3215137-3215956
3213361_6 fwd	TTCAATGGCCTCGGACGCTTCACCTCCGGC	3213361_6 rev	TAGCGCAAGAGTTCGCGAAGGCATACGAGT		3215522-3216320
3213361_7 fwd	AGTCGGCGTCCAATTCTGAATGAGGTGCCA	3213361_7 rev	CCAGACCAGTCGAGCTTGCCGTAGTGCCAA		3215931-3216749
3213361_8 fwd	CTCTCCTTCTCCTTCTTCAAGTCCTCCAGA	3213361_8 rev	GGATCTCTTAGTTCGTCGTCTTCGCCCTTC		3216374-3217323
3200730_1 fwd	GCGAATGGTAGGAAATCTCAGATGATCTCA	3200730_1 rev	GCTGGTAGACCCGGAATCTCATAAGTATAA		3200730-3201957
3200730_2 fwd	GCGAGATCGAGTTCCAGCCGAGACCTATCCG	3200730_2 rev	GCACCGTGCGGCTTTTCAAAGACGCCGATT		3201567-3202766
3200730_3 fwd	ATCTCTACCCTATGCAACAACAACGTCACC	3200730_3 rev	TGCGGACATGGCTGCGGCAGTCCTAGAGAA		3202381-3203581
3200730_4 fwd	ACCTTCTTCAGGTGCGAAAGAATGGAAGTGTC	3200730_4 rev	CACACAACACAGCCACAACCGGGGTTGAAC		3203188-3204387
3200730_5 fwd	ATGGAAAGAGGATCAGCCATGCTGTCTTGT	3200730_5 rev	AGTGTTGCTACAATCTCTTGCCCTTTTCTC		3203981-3205180
3200730_6 fwd	AACATACGCTGCACCATGGCCGACCAAGAA	3200730_6 rev	AACGGCGGCTGAGCAAAGTCCAACGTCTCCAC		3204771-3205963
3200730_7 fwd	CGGCGAAGCCGCAGCAGCAGGCATCACCGACC	3200730_7 rev	AGAGTGATGGCATTGAACACGAGGAATTCC		3205571-3206777
3200730_8 fwd	CAGACGGCGCTGTTGTCAAAAAGTCATCACAC	3200730_8 rev	CCCGCGCGAAACTCACCTGATCCATCACAT		3206371-3207570
3200730_9 fwd	GTGCTTGTTGAGATGTTGCACAGCGTGGTTG	3200730_9 rev	GGTTCTGTGACTTCTGTTGCGGGCGGAGAG		3207179-3208378
3200730_10 fwd	CGACTCTGGGACCGTACGAGGGTATGACGA	3200730_10 rev	GCGTCAACATGCTAGAGGAAATCCGTGCAT		3207972-3209189
3200730_11 fwd	CGGAAATGTTGACTGCGATGACAGAACACA	3200730_11 rev	TTCCCGTTCCTTCGAGCTCCTCCTGTTGCT		3208771-3209980
3200730_12 fwd	TCGGCGGAGCCATTGGTCGCAACAACGAGCTT	3200730_12 rev	TGCAACACTTCACGAGCATTCCCCTGCTCC		3209569-3210448

## Sheet: Oligos cloning and SDM
Oligos for KO and expression constructs
Oligo name (Fwd)	5'-3' Sequence (Fwd)	Oligo name (Rev)	5'-3' Sequence (Rev)	Description
attB4_5'altSDHC KO_GateFwd	GGGGACAACTTTGTATAGAAAAGTTGCTCCTCTCCTCCCTTGTTGCCCCTC	attB1r_5'altSDHC KO_GateRev	GGGGACTGCTTTTTTGTACAAACTTGCCTGAGGATACCTATCAATCACAGCGC	Amplification of 2071 bp upstream of the altSDHC gene (fragment carrying first exon 65bp of altSDHC) of 06STD014 strain for BP cloning
attB2r_3'altSDHC KO_GateFwd	GGGGACAGCTTTCTTGTACAAAGTGGCTCTGCGTGACGTCGGCGTTCGCGTTG	attB3_3'altSDHC KO_GateRev	GGGGACAACTTTGTATAATAAAGTTGCCAGTGAAGGGCGTGATGGTGAAGAG	Amplification of of 1313 bp downstream of the altSDHC gene (fragment carrying 33bp of 3rd exon) of 06STD024 strain for BP cloning
attB4_5'SDHC KO_GateFwd	GGGGACAACTTTGTATAGAAAAGTTGTATCTCGGACCAGGTTGAGGCCACG	attB1r_5'SDHC KO_GateRev	GGGGACTGCTTTTTTGTACAAACTTGCCCTAGGACGATAGCAGCGGAGGGTGG	Amplification of 1kp upstream of the SDHC gene of IPO323 strain (fragment carrying first exon and 87bp of SDHC) for BP cloning
attB2r_3'SDHC KO_GateFwd	GGGGACAGCTTTCTTGTACAAAGTGGCTGTGGATGGGGAAATGAGGGAGGAGA	attB3_3'SDHC KO_GateRev	GGGGACAACTTTGTATAATAAAGTTGCCGGCAAGAGGGGAGAGCGGAGAAGAG	Amplification of 917bp downstream of the SDHC gene of IPO323 strain (fragment carrying 221bp fragment of third exon of SDHC) for BP cloning
attB1 altSDHC	GGGGACAAGTTTGTACAAAAAAGCAGGCTCACCATGCTCTCCAGAACCGCTCGGTA	attB2 altSDHC	GGGGACCCAGCTTTCTTGTACAAAGTGGTCATACGAGGGCCAACGCGAACGC	Amplification of altSDHC gene for BP cloning into pDONR_Zeo plasmid
SDM_altC_I78A_fwd	GCAGATAACCTGGTATCTTTCGGCCCTCAATCGAATTACTGGCGTC	SDM_altC_I78A_rev	GACGCCAGTAATTCGATTGAGGGCCGAAAGATACCAGGTTATCTGC	Site direceted mutagenesis of pENTRZeo-alt-SDHC to generate pENTRZeo-alt-SDHC_I78A
attB4_TetOff	GGGGACAACTTTGTATAGAAAAGTTGTGGCCGAGCAGCTGAAGCTATTCGACC	attB1R_TetOff	GGGGACTGCTTTTTTGTACAAACTTGAATTGATAGAAGTAAGGTAGTTGAT	Amplification of the 1851bp TetOff promoter cassette from pMF2-4h- plasmid for BP cloning

## Sheet: Oligos qPCR
Target gene	Oligonucleotide name	Oligonucleotide sequence (5'>3')	Fluorophore / Quencher	Product size (bp)
SDHC1 (XM_003850403)	qPCR_SDHC1_fwd	GGCAACAACTCCTTCCAACAG	/	148 (210 on gDNA)
	qPCR_SDHC1_rev	ACCAGGTTATTTGCGGTTTGT	/
	qPCR_SDHC1_probe	CCAAGTAACAGCAGCCGCCGTCTCCGAATC	Cy5 / BHQ2
altSDHC/SDHC3 (total)	qPCR_altSDHC-total_fwd	GCCTATCTCGTCGCTCCTT	/	103
	qPCR_altSDHC-total_rev	CGAATTTGGTGAGGAATTGTACGA	/
	qPCR_altSDHC-total_probe	AGCGTTCGCGTCATGGCCGG	FAM / BHQ1
altSDHC/SDHC3 intron 2 un-spliced	qPCR_altSDHC-intron2_fwd	GTGACGAACGCGATGTTCGC	/	100
	qPCR_altSDHC-intron2_rev	GCGTTGAGCCTGTAGAAGAGCG	/
	qPCR_altSDHC-intron2_probe	CATGAGCCGTAGACAGAATGCTCGCTGAC	Texas Red / BHQ2
TUB1 (XM_003856727*)	qPCR_TUB1_fwd	AGCGCATGAATGTCTACTTCAA	/	177 (266 on gDNA)
	qPCR_TUB1_rev	CCTTGGCCCAGTTGTTTCC	/
	qPCR_TUB1_probe	TCGGTCAGCTCTTCCGCCCAGA	HEX / BHQ1
*Wrong translation start prediction in database

## Sheet: Oligos for ref qPCR plasmid
Target gene	Oligonucleotide name	Oligonucleotide sequence (5'>3')	5'-overlap for seamless cloning	Product size (bp)
SDHC1 (XM_003850403)	RP_SDHC1_cDNA_SC_for	AATTCGAGCTCGGTACATGTTGGCACAGAAGCTCACCCAG	pUC19 vector	588
	RP_SDHC1_cDNA_SC_rev	GAGAGCATCTACAAGAAAGCCAACCCCAACGC	altSDHC/SDHC3
altSDHC/SDHC3 (accession nr)	RP_altSDHC_gDNA_SC_for	TCTTGTAGATGCTCTCCAGAACCGCTCGGTAT	SDHC1	674
	RP_altSDHC_gDNA_SC_rev	GCACCGATTCATACGAGGGCCAACGCGAACGC	TUB1
TUB1 (XM_003856727*)	RP_TUB1_cDNA_SC_for	TCGTATGAATCGGTGCTGCTTTCTGGCAGACC	altSDHC/SDHC3	1323
	RP_TUB1_cDNA_SC_rev	GCCAAGCTTGCATGCCTTACTCCTCGCCCTCGAGAGGAGC	pUC19 vector

## Sheet:  Sequencings Oligos
Oligo ID Microsynth	Name	Sequence	Purpose	Remark
# 2780047	specific SDHC fwd	GCTCTTCTACAGGCTCAACGCCACGCAAACCG	amplification of fragment of alternative SDHC gene	used for screening populations for presence/abscence
# 2780048	specific SDHC rev	CCGACGTCACGCTAAGTCCCACCACAGTCCA
# 2780049	SDHC altern fwd	CCCTCCTCAACCTACGTTTTTACAATCACAT	amplification of full alternative SDHC gene	used for screening populations for presence / absence
# 2780050	SDHC altern rev	ATAATCGTACCGTATGTGAACCTTCGCTGG
# 2780051	Altprom Rev1	tatccgatgctggagcaccccagtc	amplification of alternative-SDHC gene promotor
# 2780052	Altprom Rev2	gggatccatttgtcgagtcttcgctg
# 2780053	Altprom Rev3	tagtcttcgatttcttgcaatgcctcgag
# 2780054	Altprom Rev4	cacctcgatcaagtgagattcttccaagc
# 2780055	Altprom Rev5	ttcggagcaacgcactgccctgg		Promotor alt-SDHC amplification for all isolates
# 2797703	3200730_11 fwd	CGGAAATGTTGACTGCGATGACAGAACACA		used for anchoring chr3 amplification all isolates
# 2797704	SNP 3213361 rev	GCGAAGGAATGAACTGAACAAAG
# 2797705	Altprom For5 seq	GTC CGC TAC AGT ATG GTA TC	sequencing of alternative-SDHC gene promotor	sequencing promoter all isolates
# 2797706	SDH C altern seq Rev	taccgtatgtgaaccttcgctg		used for anchoring chr3 sequencing in all isolates and sequencing promoter all isolates
# 2797707	Altprom seq Rev1	ATG TGA GCC GAA GTT TAG CG
# 2797708	Altprom For1 seq	tgctccagcatcggatac
# 2803358	Altprom Rev2 seq	TGAGGAATTGTACGACCG
# 2803359	Altprom For2 seq	TCT TTC CAT CTA TCG TCC GCA G
# 2803360	Altprom Rev3 seq	GTA TCT TCA GCT GAG GTA CG
# 2803361	Altprom For3 seq	GTG AGA TCC AGC TTA TCC
# 2803362	Altprom Rev4 seq	GAC AAG CGA CAA CCT CAT AC
# 2803363	Altprom For4 seq	GGG ATC CAT TTG TCG AGT CTT C
# 2803364	Altprom Rev6 seq	CAG AGA AAC TTC GAT CCC TG
# 2803365	Altprom For6 seq	TTG TGG CGA AAC CTA GTC
# 2803366	Altprom Rev7 seq	AAA GTG TTC CAA CGC GGT G
# 2803367	Altprom For7 seq	ATA CCA TCT TCG CAG CCC TTC
# 2818722	SDH C altern seq for	GTC AAC TCT GCT CTC CAT TG	sequencing of anchoring region of alternative SDHC in chromosome 3	used for anchoring chr3 sequencing all isolates
# 2818723	anchor seq for 1	AGC TCA GCA TAT GTC TGC TC
# 2818724	anchor seq rev 1	CTA TCT CAT GCC AGG AAC
# 2818725	anchor seq rev 2	TGG AGG TGG AGT TGA TTG C
# 2818726	anchor seq for 2	GTT TCG GTG ATT CAC GTA CC
# 3093070	SeqStGSdhCrev5	ATT TCG TTG CGG GCG TGG GAT TC	sequencing SdhC 5' region missing in some field isolates
# 3107840	SeqStGSdhCrevE3	ATT TCG TTG CGG GCG TGG GAT TCG	sequencing SdhCintron 2 region missing in F037 isolate
# 3179279	cDNA alt SDHC fwd	TCCAGAACCGCTCGGTATTCAATC	amplification Zt_ alternative SDHC cDNA fragment for semi quant PCR	Used for semi quant RT-PCR experiment
# 3179280	cDNA alt SDHC rev	GAATTTGGTGAGGAATTGTACGACCG
# 3179281	cDNA 323 SDHC fwd	CAGAAGCTCACCCAGCAGTCGC	amplification of ZtSDHC1 cDNA 400bpfragment for semi quant PCR	Used for semi quant RT-PCR experiment
# 3179282	cDNA 323 SDHC rev	GTCTTGGTCAAGACCTGCAACAGGAC
# 3179283	cDNA tub fwd	GCTTTCTGGCAGACCATCTCCG	amplification Zt_ Tubulin cDNA fragment for semi quant PCR	Used for semi quant RT-PCR experiment
# 3179284	cDNA tub rev	CCTCACGGATCTTGCTGATGAGAAG
# 3190730	cDNA 323 SDHC Fw 2	CAGAAACTCACTCAGCAATCGC	amplification ZtSDHC1 cDNA 400bp fragment in strains D053 / IR20.3 / GB009 / D024 / F011	Used for semi quant RT-PCR experiment
	cDNA 323 SDHC rev 2	TCT TGG TCA AGA CCT GCA ACA GG
# 3119333	Zt_gSdhC_fw	ACC ACC ACC ACC GCA T	amplification SDHC gDNA in 09STF037	Sequencing ZtSDHC1 of 09STF037 isolate
# 3119334	Zt_gSdhC_rev	CCT GAT GTA CCA TCT CTC TTC
# 3119335	Zt_gSdhC_fw2	ATC CAC CAC CCC TCC ACT
in house microsynth	SeqZt_gSdhC_rev	TTG GAG GGC TAC TGT TGG AG	sequencing SDHC ATG region missing in F037 isolate
